# Supplementary material for: Effectiveness of Antimicrobial Stewardship Program in Long-Term Care: A Five-Year Prospective Single-Center Study
Source: Hindawi journal article supplement (doi:10.1155/2022/8140429), 2022-04-12
Supplement: f1 [file 8140429.f1.zip]

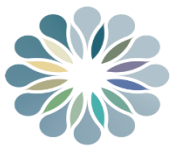

IEC

المركز الدولي للرعاية الممتدة  
International Extended Care Centre

بالقلب نرعاكم  
We embrace, we care

## Antibiotic Stewardship Review & Approval Form

Patient Name \_\_\_\_\_ Patient MRN \_\_\_\_\_

Sex: ☐ Female ☐ Male Location: ☐ B2, ☐ B3, ☐ B4. Date: \_\_\_\_ / \_\_\_\_ / 2020

**Antibiotic Requested:** ☐ Moxifloxacin ☐ Levofloxacin ☐ Piperacillin/Tazobactam ☐ Cefepime ☐ Colistin

☐ Meropenem ☐ Imipenem ☐ Caspofungin ☐ Tigecycline

☐ Micafungin ☐ Anidulafungin ☐ Voriconazole ☐ Amphotericin ☐ Linezolid ☐ Amikacin ☐ Acyclovir

Dosage Form: ☐ I.V. ☐ Nebulization ☐ Oral

Dose: \_\_\_\_\_ Frequency \_\_\_\_\_ Duration: \_\_\_\_\_ CrCl: \_\_\_\_\_ ☐ Dialysis

### Indication:

a) Empirical ☐: \_\_\_\_\_

- **Appropriate investigations were obtained:** ☐ Peripheral blood culture ☐ Central blood culture ☐ Urine analysis  
☐ Urine culture ☐ Sputum ☐ Wound ☐ Stool for toxin ☐ CSF ☐ Chest-X-ray ☐ CT

b) To be reviewed in \_\_\_\_\_ Days

c) Therapeutic ☐:

- ☐ HAP ☐ VAP ☐ Bacteremia ☐ UTI ☐ Pyelonephritis ☐ Candidemia  
☐ Osteomyelitis ☐ Wound infection ☐ Cellulites ☐ Meningitis ☐ Line Infection  
☐ Shunt ☐ Other: \_\_\_\_\_

Diagnosis: \_\_\_\_\_

Plan: \_\_\_\_\_

MRP Name: \_\_\_\_\_ Signature: \_\_\_\_\_ Date: \_\_\_\_\_

Clinical Pharmacist Name: \_\_\_\_\_ Signature: \_\_\_\_\_ Date: \_\_\_\_\_
